# Supplementary material for: Shotgun Lipidomics by Sequential Precursor Ion Fragmentation on a Hybrid Quadrupole Time-of-Flight Mass Spectrometer
Source: Metabolites. 2012 Feb 20;2(1):195–213. doi: 10.3390/metabo2010195 (PMC3901199; doi:10.3390/metabo2010195)
Supplement: Supplementary File 1 — PDF-Document (PDF, 225 KB) [file metabolites-02-00195-s001.pdf]

**Supplementary Table 1.** Lipid species identified from both polarity modes in human plasma.

| Lipid class        | Lipid species |
|--------------------|---------------|
| Cholesteryl Esters | CE 14:0       |
|                    | CE 14:1       |
|                    | CE 16:0       |
|                    | CE 16:1       |
|                    | CE 16:2       |
|                    | CE 17:0       |
|                    | CE 17:1       |
|                    | CE 18:0       |
|                    | CE 18:1       |
|                    | CE 18:2       |
|                    | CE 18:3       |
|                    | CE 20:2       |
|                    | CE 20:3       |
|                    | CE 20:4       |
|                    | CE 20:5       |
|                    | CE 22:6       |
| Diacylglycerols    | DAG 32:0      |
|                    | DAG 32:1      |
|                    | DAG 34:0      |
|                    | DAG 34:1      |
|                    | DAG 34:2      |
|                    | DAG 34:3      |
|                    | DAG 36:1      |
|                    | DAG 36:2      |
|                    | DAG 36:3      |
|                    | DAG 36:4      |
|                    | DAG 36:5      |
|                    | DAG 36:6      |
|                    | DAG 38:4      |
|                    | DAG 38:5      |
|                    | DAG 38:6      |
|                    | DAG 38:7      |
|                    | DAG 38:8      |
|                    | DAG 40:6      |
|                    | DAG 40:7      |
|                    | DAG 40:8      |
|                    | DAG 42:6      |
|                    | DAG 42:7      |
|                    | DAG 44:8      |

**Supplementary Table 1. *Cont.***

| <b>Lipid class</b> | <b>Lipid species</b> |
|--------------------|----------------------|
| Monoacylglycerols  | MAG 10:0             |
|                    | MAG 12:0             |
|                    | MAG 14:0             |
|                    | MAG 14:1             |
|                    | MAG 16:0             |
|                    | MAG 16:1             |
|                    | MAG 18:0             |
|                    | MAG 18:1             |
|                    | MAG 18:2             |
|                    | MAG 18:3             |
|                    | MAG 20:1             |
|                    | MAG 20:2             |
|                    | MAG 20:3             |
|                    | MAG 20:5             |
|                    | MAG 22:0             |
|                    | MAG 22:1             |
|                    | MAG 22:2             |
|                    | MAG 24:1             |
| Triacylglycerols   | TAG 38:1             |
|                    | TAG 40:0             |
|                    | TAG 40:1             |
|                    | TAG 44:0             |
|                    | TAG 46:1             |
|                    | TAG 46:2             |
|                    | TAG 48:0             |
|                    | TAG 48:1             |
|                    | TAG 48:2             |
|                    | TAG 50:0             |
|                    | TAG 50:1             |
|                    | TAG 50:2             |
|                    | TAG 50:3             |
|                    | TAG 50:4             |
|                    | TAG 50:6             |
|                    | TAG 50:8             |
|                    | TAG 52:0             |
|                    | TAG 52:1             |
|                    | TAG 52:2             |
|                    | TAG 52:3             |
|                    | TAG 52:4             |
|                    | TAG 52:5             |
|                    | TAG 52:6             |
|                    | TAG 54:1             |
|                    | TAG 54:2             |
|                    | TAG 54:3             |
|                    | TAG 54:4             |

**Supplementary Table 1. *Cont.***

| <b>Lipid class</b> | <b>Lipid species</b> |
|--------------------|----------------------|
| Triacylglycerols   | TAG 54:5             |
|                    | TAG 54:6             |
|                    | TAG 54:7             |
|                    | TAG 56:10            |
|                    | TAG 56:2             |
|                    | TAG 56:3             |
|                    | TAG 56:4             |
|                    | TAG 56:5             |
|                    | TAG 56:6             |
|                    | TAG 56:7             |
|                    | TAG 56:8             |
|                    | TAG 56:9             |
|                    | TAG 58:10            |
|                    | TAG 58:11            |
|                    | TAG 58:6             |
|                    | TAG 58:7             |
|                    | TAG 58:8             |
|                    | TAG 58:9             |
|                    | TAG 60:10            |
|                    | TAG 60:11            |
|                    | TAG 60:12            |
|                    | TAG 60:9             |
|                    | TAG 66:10            |
|                    | TAG 66:9             |
|                    | TAG 70:12            |
| Free Fatty Acids   | FFA 10:0             |
|                    | FFA 12:0             |
|                    | FFA 14:0             |
|                    | FFA 14:1             |
|                    | FFA 16:0             |
|                    | FFA 16:1             |
|                    | FFA 18:0             |
|                    | FFA 18:1             |
|                    | FFA 18:2             |
|                    | FFA 18:3             |
|                    | FFA 20:0             |
|                    | FFA 20:1             |
|                    | FFA 20:2             |
|                    | FFA 20:3             |
|                    | FFA 20:4             |
|                    | FFA 20:5             |
|                    | FFA 22:0             |
|                    | FFA 22:1             |
|                    | FFA 22:2             |

**Supplementary Table 1. *Cont.***

| <b>Lipid class</b>                                   | <b>Lipid species</b> |
|------------------------------------------------------|----------------------|
| Free Fatty Acids                                     | FFA 22:4             |
|                                                      | FFA 22:5             |
|                                                      | FFA 22:6             |
|                                                      | FFA 24:0             |
|                                                      | FFA 24:1             |
| Lysophosphatidic acids                               | LPA 12:0             |
|                                                      | LPA 14:0             |
|                                                      | LPA 16:0             |
|                                                      | LPA 16:1             |
|                                                      | LPA 18:2             |
|                                                      | LPA 22:6             |
|                                                      | LPA 24:0             |
| Lysophosphatidylcholines                             | LPC 14:0             |
|                                                      | LPC 16:0             |
|                                                      | LPC 16:1             |
|                                                      | LPC 18:0             |
|                                                      | LPC 18:1             |
|                                                      | LPC 18:2             |
|                                                      | LPC 18:3             |
|                                                      | LPC 20:3             |
|                                                      | LPC 20:4             |
|                                                      | LPC 20:5             |
|                                                      | LPC 22:5             |
|                                                      | LPC 22:6             |
| Ether-linked/plasmalogen<br>lysophosphatidylcholines | LPC O-16:0           |
|                                                      | LPC O-18:0           |
|                                                      | LPC O-18:1           |
|                                                      | LPC O-18:2           |
| Lysophosphatidylethanolamines                        | LPE 12:0             |
|                                                      | LPE 14:0             |
|                                                      | LPE 16:0             |
|                                                      | LPE 18:0             |
|                                                      | LPE 18:1             |
|                                                      | LPE 18:2             |
|                                                      | LPE 20:0             |
|                                                      | LPE 20:3             |
|                                                      | LPE 20:4             |
|                                                      | LPE 20:5             |
|                                                      | LPE 22:4             |
|                                                      | LPE 22:6             |
| Lysophosphatidylinositols                            | LPI 20:3             |
| Phosphatidic acids                                   | PA 28:0              |
|                                                      | PA 28:1              |
|                                                      | PA 30:1              |

**Supplementary Table 1. *Cont.***

| <b>Lipid class</b>                          | <b>Lipid species</b>                                 |
|---------------------------------------------|------------------------------------------------------|
| Phosphatidic acids                          | PA 32:0 (14:0/18:0, 16:0/16:0)                       |
|                                             | PA 32:1                                              |
|                                             | PA 32:2                                              |
|                                             | PA 34:1                                              |
|                                             | PA 34:2                                              |
|                                             | PA 36:0 (18:0/18:0)                                  |
| Phosphatidic acids                          | PA 36:1 (18:1/18:0)                                  |
|                                             | PA 36:2 (18:2/18:0, 18:1/18:1)                       |
|                                             | PA 36:3 (18:0/18:3, 18:1/18:2)                       |
|                                             | PA 36:6 (18:3/18:3)                                  |
|                                             | PA 38:3 (18:0/20:3)                                  |
|                                             | PA 38:4 (18:0/20:4, 18:1/20:3)                       |
|                                             | PA 38:5 (18:1/20:4, 18:0/20:5)                       |
|                                             | PA 38:6 (18:1/20:5)                                  |
|                                             | PA 40:4                                              |
|                                             | PA 40:5                                              |
|                                             | PA 40:6 (18:0/22:6, 18:1/22:5)                       |
|                                             | PA 40:7 (18:1/22:6).                                 |
| Ether-linked/plasmalogen phosphatidic acids | PA O-34:3                                            |
|                                             | PA O-36:1                                            |
|                                             | PA O-36:3                                            |
|                                             | PA-O 36:5                                            |
| Phosphatidylcholines                        | PC 30:0 (16:0/14:0)                                  |
|                                             | PC 30:1                                              |
|                                             | PC 30:2                                              |
|                                             | PC 32:0 (14:0/O-18:0, 16:0/O-16:0)                   |
|                                             | PC 32:1 (18:1/14:0, 16:1/16:0)                       |
|                                             | PC 32:2 (16:1/16:1, 18:2/14:0)                       |
|                                             | PC 34:0 (16:0/18:0)                                  |
|                                             | PC 34:1 (18:1/16:0, 16:1/18:0)                       |
|                                             | PC 34:2 (16:0/18:2, 16:1/18:1)                       |
|                                             | PC 34:3 (16:0/18:3, 16:1/18:2)                       |
|                                             | PC 34:4 (20:4/14:0)                                  |
|                                             | PC 36:0 (18:0/18:0)                                  |
|                                             | PC 36:1(18:1/18:0, 16:0/20:1)                        |
|                                             | PC 36:2 (18:1/18:1, 18:2/18:0, 16:0/20:2)            |
|                                             | PC 36:3 (16:0/20:3, 18:0/18:3, 18:1/18:2)            |
|                                             | PC 36:4 (16:0/20:4, 16:1/20:3, 18:2/18:2, 18:1/18:3) |
|                                             | PC 36:5 (16:0/20:5)                                  |
|                                             | PC 36:6 (16:1/20:5)                                  |
|                                             | PC 38:0                                              |

**Supplementary Table 1. *Cont.***

| <b>Lipid class</b>                            | <b>Lipid species</b>                                  |
|-----------------------------------------------|-------------------------------------------------------|
| Phosphatidylcholines                          | PC 38:2 (18:0/ 20:2)                                  |
|                                               | PC 38:3 (18:0/ 20:3, 18:1/20:2)                       |
|                                               | PC 38:4 (16:0/22:4, 18:0/20:4, 18:1/20:3)             |
|                                               | PC 38:5 (16:0/22:5, 18:0/ 20:5, 18:1/20:4, 18:2/20:3) |
|                                               | PC 38:6 (16:0/22:6, 18:1/20:5, 18:2/20:4)             |
|                                               | PC 38:7 (16:1/22:6)                                   |
|                                               | PC 40:0                                               |
|                                               | PC 40:1                                               |
|                                               | PC 40:2                                               |
|                                               | PC 40:3                                               |
|                                               | PC 40:4 (18:0/22:4)                                   |
|                                               | PC 40:5 (18:0/22:5)                                   |
|                                               | PC 40:6 (18:0/22:6, 18:1/ 22:5)                       |
|                                               | PC 40:7 (18:0/22:6)                                   |
|                                               | PC 40:8                                               |
|                                               | PC 42:0                                               |
|                                               | PC 44:1                                               |
|                                               | PC 44:2                                               |
|                                               | PC 44:3                                               |
|                                               | PC 44:4                                               |
| Ether-linked/plasmalogen phosphatidylcholines | PC O-28:0 (10:0/O-18:0)                               |
|                                               | PC O-32:0 (14:0/O-18:0)                               |
|                                               | PC O-32:1 (14:1/O-18:0, 14:0/O-18:1)                  |
|                                               | PC O-34:0 (16:0/O-18:0)                               |
|                                               | PC O-34:1                                             |
|                                               | PC O-34:2 (16:2 / O-18:0)                             |
|                                               | PC O-34:3                                             |
|                                               | PC O-34:4                                             |
|                                               | PC O-36:0 (18:0/O-18:0)                               |
|                                               | PC O-36:1 (18:1/O-18:0)                               |
|                                               | PC O-36:2 (18:2/O-18:0)                               |
|                                               | PC O-36:3                                             |
|                                               | PC O-36:4                                             |
|                                               | PC O-36:5                                             |
|                                               | PC O-38:0 (20:0/O-18:0)                               |
|                                               | PC O-38:1 (20:1/O-18:0)                               |
|                                               | PC O-38:3 (20:3/O-18:0)                               |
|                                               | PC O-38:4 (20:4/O-18:0)                               |
|                                               | PC O-38:5 (20:5/O-18:0)                               |
|                                               | PC O-38:6                                             |
|                                               | PC O-40:4 (22:4/O-18:0)                               |

**Supplementary Table 1. *Cont.***

| <b>Lipid class</b>                                    | <b>Lipid species</b>                                    |
|-------------------------------------------------------|---------------------------------------------------------|
| Ether-linked/plasmalogen<br>phosphatidylcholines      | PC O-40:5                                               |
|                                                       | PC O-40:6                                               |
|                                                       | PC O-42:3                                               |
|                                                       | PC O-42:5                                               |
|                                                       | PC O-42:6                                               |
|                                                       | PC O-44:5                                               |
| Phosphatidylethanolamines                             | PE 32:0 (14:0/18:0 and 16:0./16:0)                      |
|                                                       | PE 34:0 (16:0/18:0)                                     |
|                                                       | PE 34:1 (16:0/18:1, 18:0/16:1)                          |
|                                                       | PE 34:2 (16:0/18:2)                                     |
|                                                       | PE 34:3 (16:0/18:3)                                     |
|                                                       | PE 36:0 (18:0/18:0)                                     |
|                                                       | PE 36:1 (18:0/18:1)                                     |
|                                                       | PE 36:2 (18:0/18:2, 18:1/18:1)                          |
|                                                       | PE 36:3 (16:0/20:3, 18:1/18:2,<br>18:3/18:0)            |
|                                                       | PE 36:4 (16:0/20:4, 18:2/18:2)                          |
|                                                       | PE 36:5 (16:0/20:5)                                     |
|                                                       | PE 38:1                                                 |
|                                                       | PE 38:2                                                 |
|                                                       | PE 38:3 (18:0/20:3)                                     |
|                                                       | PE 38:4 (18:0/20:4, 18:1/20:3,<br>16:0/22:4)            |
|                                                       | PE 38:5 (16:0/22:5, 18:0/20:5, 18:1/20:4,<br>16:1/22:4) |
|                                                       | PE 38:6 (18:1/20:5, 16:0/22:6, 16:1/22:5,<br>18:2/20:4) |
|                                                       | PE 40:2                                                 |
|                                                       | PE 40:4 (18:0/22:4)                                     |
|                                                       | PE 40:5( 18:0/22:5)                                     |
|                                                       | PE 40:6 (22:6/18:0)                                     |
|                                                       | PE 40:7 (22:6/18:1)                                     |
|                                                       | PE 42:5                                                 |
|                                                       | PE 42:6                                                 |
|                                                       | PE 42:7                                                 |
|                                                       | PE 44:6                                                 |
|                                                       | PE 46:0                                                 |
|                                                       | PE 46:1                                                 |
|                                                       | PE 48:2                                                 |
| Ether-linked/plasmalogen<br>phosphatidylethanolamines | PE O-32:2                                               |
|                                                       | PE O-36:1 (18:0/O-18:1)                                 |
|                                                       | PE O-36:3 (18:2/O-16:1)                                 |
|                                                       | PE O-36:6                                               |
|                                                       | PE O-38:0                                               |
|                                                       | PE O-38:5                                               |

**Supplementary Table 1. *Cont.***

| <b>Lipid class</b>                                    | <b>Lipid species</b>           |
|-------------------------------------------------------|--------------------------------|
| Ether-linked/plasmalogen<br>phosphatidylethanolamines | PE O-38:6 (22:6/O-16:0)        |
|                                                       | PE O-40:0                      |
|                                                       | PE O-40:1                      |
|                                                       | PE O-40:2                      |
|                                                       | PE O-40:5 (22:5/O-18:0)        |
|                                                       | PE O-40:6 (22:6/O-18:0)        |
|                                                       | PE O-42:2                      |
|                                                       | PE O-42:5                      |
|                                                       | PE O-44:0                      |
|                                                       | PE O-44:1                      |
|                                                       | PE O-44:4                      |
|                                                       | PE O-44:5                      |
|                                                       | PE O-46:2                      |
|                                                       | PE O-46:4                      |
|                                                       | PE O-46:5                      |
|                                                       | PE O-46:6                      |
|                                                       | PE O-48:2                      |
|                                                       | PE O-48:5                      |
|                                                       | PE O-48:6                      |
| Phosphatidylglycerols                                 | PG 30:0                        |
|                                                       | PG 32:0                        |
|                                                       | PG 34:0 (16:0/18:0)            |
|                                                       | PG 34:2 (16:0/18:2)            |
|                                                       | PG 36:0 (18:0/18:0)            |
|                                                       | PG 36:1 (18:1/18:0)            |
|                                                       | PG 36:2 (18:0/18:2, 18:1/18:1) |
|                                                       | PG 36:4 (18:2/18:2)            |
|                                                       | PG 36:6 (16:1/20:5)            |
|                                                       | PG 38:5 (18:0/20:5)            |
|                                                       | PG 38:6 (16:0/22:6)            |
|                                                       | PG 40:6 (20:3)                 |
|                                                       | PG 42:10 (20:5/22:5)           |
|                                                       | PG 42:9 (20:4/22:5)            |
| Ether-linked/plasmalogen<br>phosphatidylglycerols     | PG O-36:0 (18:0/O-18:0)        |
|                                                       | PG O-36:3 (18:3/O-16:0)        |
| Phosphatidylinositols                                 | PI 28:0                        |
|                                                       | PI 32:0 (14:0/18:0)            |
|                                                       | PI 32:1 (14:0/18:1)            |
|                                                       | PI 32:2 (16:1/16:1)            |
|                                                       | PI 34:0 (16:0/18:0)            |
|                                                       | PI 34:1 (16:1/18:0, 18:1/16:0) |
|                                                       | PI 34:2 (16:0/18:2)            |
|                                                       | PI 36:0 (18:0/ 18:0)           |
|                                                       | PI 36:1 (18:1/18:0)            |

**Supplementary Table 1. Cont.**

| <b>Lipid class</b>                             | <b>Lipid species</b>                      |
|------------------------------------------------|-------------------------------------------|
| Phosphatidylinositols                          | PI 36:2 (18:1/18:1, 18:2/18:0)            |
|                                                | PI 36:3 (18:3/18:0, 18:1/18:2, 16:0/20:3) |
|                                                | PI 36:4 (16:0/20:4, 18:2/18:2)            |
|                                                | PI 38:2 (18:0/ 20:2)                      |
|                                                | PI 38:3 (18:0/20:3)                       |
|                                                | PI 38:4 (18:0/20:4, 18:1/20:3)            |
|                                                | PI 38:5 (16:0/22:5, 18:0/20:5, 18:1/20:4) |
|                                                | PI 38:6 (16:0/22:6)                       |
|                                                | PI 40:5 (18:0/22:5)                       |
|                                                | PI 40:6 (18:0/22:6)                       |
| Ether-linked/plasmalogen phosphatidylinositols | PI O-36:2 (18:2/O-18:0)                   |
| Phosphatidylserines                            | PS 34:0 (16:0/18:0)                       |
|                                                | PS 34:3 (16:0/18:3)                       |
|                                                | PS 34:7 (12:1/22:6)                       |
|                                                | PS 36:0 (18:0/18:0)                       |
|                                                | PS 36:1 (18:1/18:0)                       |
|                                                | PS 36:2 (18:2/18:0, 18:1/18:1)            |
|                                                | PS 36:3 (18:1/18:2)                       |
|                                                | PS 36:4 (18:2/18:2)                       |
|                                                | PS 36:8 (14:2/22:6)                       |
|                                                | PS 38:1 (18:0/20:1)                       |
|                                                | PS 38:4 (18:0/20:4)                       |
|                                                | PS 38:5 (20:4/18:1)                       |
|                                                | PS 38:6 (18:2/20:4)                       |
|                                                | PS 38:8 (16:2/22:6)                       |
|                                                | PS 40:6 (18:0/22:6)                       |
| Ether-linked/plasmalogen phosphatidylserines   | PS O-34:0 (16:0/O-18:0)                   |
|                                                | PS O-40:7 (22:6/O-18:1)                   |
| Sphingomyelins                                 | SM 30:1;2                                 |
|                                                | SM 30:2;2                                 |
|                                                | SM 30:3;4                                 |
|                                                | SM 32:2;3                                 |
|                                                | SM 34:0;2                                 |
|                                                | SM 34:1;2                                 |
|                                                | SM 34:1;3                                 |
|                                                | SM 34:2;2                                 |
|                                                | SM 36:0;4                                 |
|                                                | SM 36:1;2                                 |
|                                                | SM 36:2;2                                 |
|                                                | SM 36:2;3                                 |
|                                                | SM 36:3;2                                 |
|                                                | SM 36:3;3                                 |
|                                                | SM 38:0;2                                 |

**Supplementary Table 1. *Cont.***

| <b>Lipid class</b> | <b>Lipid species</b> |
|--------------------|----------------------|
| Sphingomyelins     | SM 38:1;2            |
|                    | SM 38:2;2            |
|                    | SM 38:2;3            |
|                    | SM 38:3;2            |
|                    | SM 38:3;3            |
|                    | SM 38:4;3            |
|                    | SM 40:0;3            |
|                    | SM 40:1;2            |
|                    | SM 40:1;3            |
|                    | SM 40:2;2            |
|                    | SM 40:2;3            |
|                    | SM 40:3;3            |
|                    | SM 42:1;2            |
|                    | SM 42:1;4            |
|                    | SM 42:2;2            |
|                    | SM 44:0;4            |
|                    | SM 44:1;4            |
|                    | SM 44:3;3            |
|                    | SM 44:4;3            |
|                    | SM 46:0;2            |
|                    | SM 46:1;2            |
